# Supplementary material
Source: PubMed Central journal article supplement (PMC4073437)
Supplement: ASN.2013080899_ASN2013080899SupplementaryData.pdf [file ASN.2013080899_ASN2013080899SupplementaryData.pdf]

## Supplemental Appendix

---

**Figure S1.** Study recruitment flow chart.

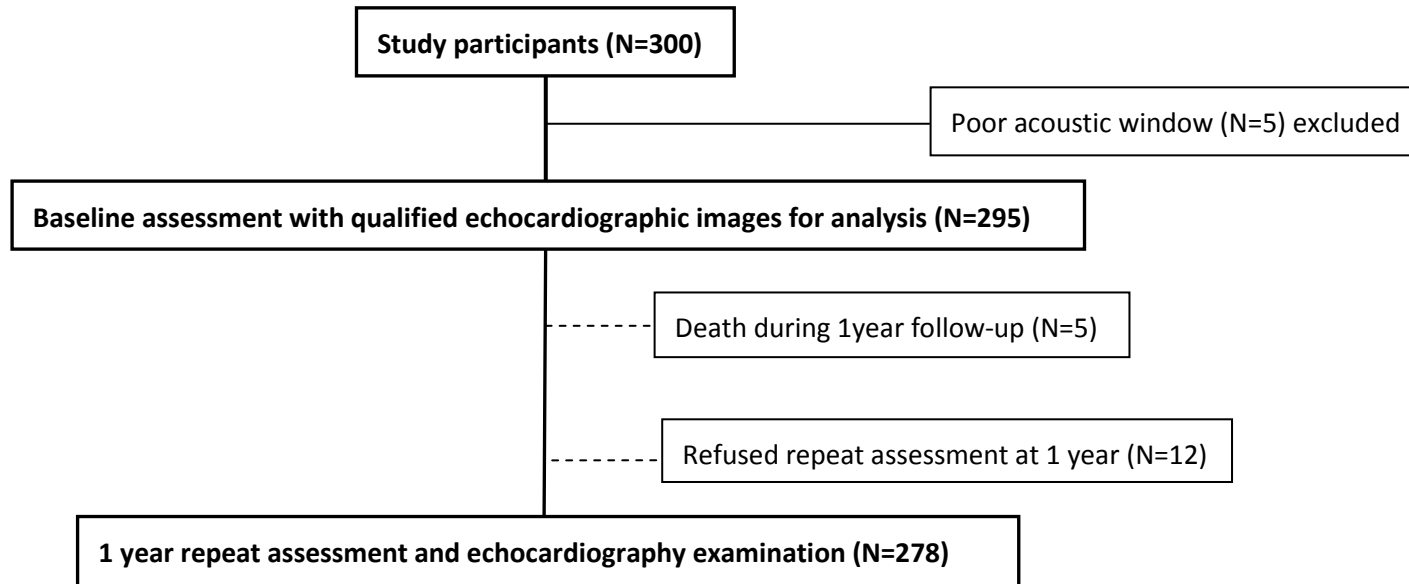

## Supplemental Appendix

**Table S1.** Comparisons of clinical and biochemical characteristics at baseline and 1 year (N=278).

|                                | Baseline    | 1 year      | <i>P</i> |
|--------------------------------|-------------|-------------|----------|
| Systolic blood pressure, mmHg  | 128 ± 19    | 133 ± 20    | <0.001   |
| Diastolic blood pressure, mmHg | 77 ± 11     | 77 ± 12     | 0.9      |
| Hemoglobin, g/dL               | 12.0 ± 2.1  | 11.9 ± 2.2  | 0.09     |
| Hematocrit, %                  | 35.8 ± 5.9  | 36.0 ± 6.0  | 0.5      |
| Fasting glucose, mg/dL         | 105 ± 36    | 108 ± 34    | 0.2      |
| Serum albumin, g/dL            | 4.19 ± 0.35 | 4.11 ± 0.37 | <0.001   |
| Serum adjusted calcium, mg/dL  | 9.40 ± 0.40 | 9.32 ± 0.48 | 0.003    |
| Serum phosphate, mg/dL         | 3.78 ± 0.77 | 3.87 ± 0.96 | 0.05     |
| Total cholesterol, mg/dL       | 180 ± 40    | 175 ± 38    | 0.02     |
| Triglyceride, mg/dL            | 135 ± 88    | 130 ± 76    | 0.3      |

Continuous data are expressed as mean ± SD.

## Supplemental Appendix

**Table S2.** Characteristics of study subjects stratified by chronic kidney disease stages.

|                                           | Stage 3a (n=61) | Stage 3b (n=77) | Stage 4&5 (n=140) | <i>P</i> |
|-------------------------------------------|-----------------|-----------------|-------------------|----------|
| Clinical data -                           |                 |                 |                   |          |
| Age, years                                | 55.7 ± 9.81     | 60.0 ± 10.2     | 61.4 ± 9.61       | 0.001    |
| Gender (M/F)                              | 36 / 25         | 43 / 34         | 77 / 63           | 0.9      |
| Diabetes mellitus, n (%)                  | 15 (24.6)       | 29 (37.7)       | 71 (50.7)         | 0.002    |
| Smoking status, n (%)                     |                 |                 |                   |          |
| - Current smoker                          | 4 (6.6)         | 8 (10.4)        | 17 (12.1)         | 0.8      |
| - Non-smoker                              | 45 (73.8)       | 55 (71.4)       | 97 (69.3)         |          |
| - Ex-smoker                               | 12 (19.7)       | 14 (18.2)       | 26 (18.6)         |          |
| Body mass index, kg/m <sup>2</sup>        | 25.3 ± 3.6      | 26.0 ± 4.3      | 25.7 ± 4.6        | 0.7      |
| Background coronary artery disease, n (%) | 2 (3.3)         | 5 (6.5)         | 19 (13.6)         | 0.04     |

## Supplemental Appendix

|                                 |             |             |             |         |
|---------------------------------|-------------|-------------|-------------|---------|
| Background heart failure, n (%) | 0 (0)       | 2 (2.6)     | 6 (4.3)     | 0.2     |
| Systolic blood pressure, mmHg   | 128 ± 18    | 123 ± 15    | 131 ± 21    | 0.02    |
| Diastolic blood pressure, mmHg  | 81 ± 11     | 76 ± 10     | 76 ± 12     | 0.02    |
| Biochemical data -              |             |             |             |         |
| Hemoglobin, g/dL                | 13.4 ± 1.8  | 12.8 ± 1.9  | 11.0 ± 1.8  | < 0.001 |
| Serum albumin, g/dL             | 4.31 ± 0.23 | 4.18 ± 0.34 | 4.13 ± 0.38 | 0.002   |
| Serum adjusted calcium, mg/dL   | 9.40 ± 0.28 | 9.52 ± 0.36 | 9.36 ± 0.48 | 0.06    |
| Serum phosphate, mg/dL          | 3.35 ± 0.59 | 3.47 ± 0.71 | 4.12 ± 0.68 | < 0.001 |
| Fasting glucose, mg/dL          | 98 ± 22     | 108 ± 35    | 106 ± 41    | 0.2     |
| Fasting low density lipoprotein | 110 ± 28    | 107 ± 32    | 99 ± 38     | 0.08    |

## Supplemental Appendix

---

cholesterol, mg/dL

Medication Use, n (%)

|                                                                                 |           |           |            |        |
|---------------------------------------------------------------------------------|-----------|-----------|------------|--------|
| Calcium channel blockers                                                        | 27 (44.3) | 45 (58.4) | 111 (79.3) | <0.001 |
| Beta-blockers                                                                   | 25 (41)   | 42 (54.5) | 75 (53.6)  | 0.2    |
| Angiotensin converting enzyme<br>inhibitors/angiotensin receptor<br>antagonists | 53 (86.9) | 62 (80.5) | 108 (77.1) | 0.3    |

---

Continuous data are expressed as mean  $\pm$  SD.

## Supplemental Appendix

Table S3. Multiple logistic regression analysis of ‘progressors’ in various cardiac structural and functional parameters in relation to baseline estimated glomerular filtration rate as a continuous variable.

| Multiple logistic regression models      | Adjusted odds ratio (95%<br>confidence intervals) | <i>P</i> -value |
|------------------------------------------|---------------------------------------------------|-----------------|
| ‘Progressor’ of LVMI                     |                                                   |                 |
| - Age and sex-adjusted                   | 0.98 (0.96 - 0.99)                                | 0.005           |
| - Plus baseline LVMI                     | 0.97 (0.96 - 0.99)                                | 0.003           |
| - Adjusted model                         | 0.97 (0.96 – 0.99)                                | 0.003           |
| - Fully adjusted model                   | 0.98 (0.96 – 1.00)                                | 0.01            |
| ‘Progressor’ of LVVi                     |                                                   |                 |
| - Adjusted for age and sex               | 0.98 (0.96 - 0.99)                                | 0.008           |
| - Plus baseline LVMI + LVVi              | 0.98 (0.96 - 0.99)                                | 0.007           |
| - Adjusted model + baseline LVVi         | 0.98 (0.96 – 1.00)                                | 0.039           |
| - Fully adjusted model + baseline LVVi   | 0.98 (0.96 – 1.00)                                | 0.035           |
| ‘Progressor’ of LAVi                     |                                                   |                 |
| - Adjusted for age and sex               | 0.98 (0.96 - 0.99)                                | 0.005           |
| - Plus baseline LVMI and LAVi            | 0.98 (0.96 - 0.99)                                | 0.01            |
| - Adjusted model + baseline LAVi         | 0.99 (0.97 – 1.00)                                | 0.1             |
| - Fully adjusted model + baseline LAVi   | 0.99 (0.97 – 1.01)                                | 0.2             |
| ‘Progressor’ of Sm                       |                                                   |                 |
| - Age and sex-adjusted                   | 1.01 (0.99 - 1.03)                                | 0.2             |
| - Plus baseline LVMI + Sm                | 1.01 (0.99 - 1.03)                                | 0.2             |
| - Adjusted model + baseline Sm           | 1.01 (0.99 – 1.02)                                | 0.5             |
| - Fully adjusted model + baseline Sm     | 1.01 (0.99 – 1.03)                                | 0.5             |
| ‘Progressor’ of ejection fraction        |                                                   |                 |
| - Age and sex-adjusted                   | 1.00 (0.99 - 1.02)                                | 0.9             |
| - Plus baseline LVMI + ejection fraction | 1.00 (0.98 - 1.02)                                | 0.8             |
| - Adjusted model + baseline ejection     | 1.00 (0.98 – 1.02)                                | 0.7             |

## Supplemental Appendix

---

|                                              |                     |       |
|----------------------------------------------|---------------------|-------|
| fraction                                     |                     |       |
| - Fully adjusted model + baseline ejection   | 1.01 (0.99 – 1.03)  | 0.5   |
| fraction                                     |                     |       |
| ‘Progressor’ of mwFS                         |                     |       |
| - Age and sex-adjusted                       | 1.00 (0.99 – 1.02)  | 0.9   |
| - Plus baseline LVMI + mwFS                  | 1.01 (0.99 – 1.02)  | 0.5   |
| - Adjusted model + baseline mwFS             | 1.00 (0.98 – 1.02)  | 1.0   |
| - Fully adjusted model + baseline mwFS       | 1.00 (0.98 – 1.02)  | 0.8   |
| ‘Progressor’ in diastolic dysfunction grade† |                     |       |
| - Age and sex-adjusted                       | 0.97 (0.95 - 0.99 ) | 0.007 |
| - Plus baseline LVMI + diastolic function    | 0.97 (0.95 - 0.99)  | 0.003 |
| grade                                        |                     |       |
| - Adjusted model + baseline diastolic        | 0.97 (0.94 – 0.99)  | 0.005 |
| function grade                               |                     |       |
| - Fully adjusted model + baseline diastolic  | 0.97 (0.95 – 0.99)  | 0.014 |
| function grade                               |                     |       |

---

Adjusted model – adjusted for known factors associated with LV abnormalities including age, gender, diabetes, background coronary artery disease, baseline systolic blood pressure, hemoglobin, serum albumin, LDL-cholesterol, baseline LVMI as well as change in systolic blood pressure over 1 year.

Fully adjusted model – adjusted for all factors above, plus medications including use of renin-angiotensin aldosterone system blockers, beta-blockers, calcium channel blockers and diuretics.

<sup>a</sup>‘Progressor’ was defined as those in the upper 50<sup>th</sup> percentile for changes in LVMI, LVVi or LAVi over 1 year, and those with changes over 1 year in the lower 50<sup>th</sup> percentile for Sm and ejection fraction.

<sup>b</sup>‘Progressor’ in diastolic dysfunction grade was defined as deterioration in diastolic function over 1 year by 1 or more grades according to the diastolic dysfunction grading by the American Society of Echocardiography using a combination of

## Supplemental Appendix

---

echocardiographic parameters including LAVi, average of septal and lateral Em, and E/Em ratio. Subjects with already the most severe form of diastolic dysfunction (grade III) at baseline were not considered in the diastolic dysfunction progression analysis.

LVMi, left ventricular volume index; LVV, left ventricular volume index; LAVi, left atrial volume index; Sm, peak systolic mitral annular velocity; mwFS, midwall fractional shortening; Em, early diastolic mitral annular velocity; E/Em, ratio of peak early transmitral flow velocity to early diastolic mitral annular velocity.

|
